# Supplementary material for: Comparative binding study of anti-tuberculosis drug pyrazinamide with serum albumins
Source: Royal Society of Chemistry journal article supplement (doi:10.1039/c6ra10487h), 2016-01-01
Supplement: c6ra10487h1.pdf [file c6ra10487h1.pdf]

**Supplementary Table 1.** *Time resolved fluorescence data of HSA in the absence and presence of PYZ.*

| HSA: PYZ | $\alpha_1$ | $\tau_1$ (ns) | $\alpha_2$ | $\tau_2$ (ns) | $\tau_{\text{avg}}$ (ns) | $\chi^2$ |
|----------|------------|---------------|------------|---------------|--------------------------|----------|
| 1:0      | 0.39       | 2.27          | 0.64       | 6.47          | 5.62                     | 0.9801   |
| 1:5      | 0.42       | 2.12          | 0.59       | 6.23          | 5.39                     | 0.9684   |
| 1:12     | 0.46       | 1.88          | 0.56       | 6.19          | 5.33                     | 0.9563   |

**Supplementary Table 2.** *Time resolved fluorescence data of HSA in the absence and presence of PYZ.*

| BSA: PYZ | $\alpha_1$ | $\tau_1$ (ns) | $\alpha_2$ | $\tau_2$ (ns) | $\tau_{\text{avg}}$ (ns) | $\chi^2$ |
|----------|------------|---------------|------------|---------------|--------------------------|----------|
| 1:0      | 0.86       | 6.32          | 0.18       | 2.65          | 6.18                     | 1.10     |
| 1:5      | 0.84       | 6.10          | 0.17       | 1.68          | 5.92                     | 0.9939   |
| 1:12     | 0.82       | 6.04          | 0.15       | 1.61          | 5.82                     | 0.9723   |

**Supplementary Table 3:** Effect of Site Markers on Binding of PYZ to HSA

| Parameters       | Without site markers | with warfarin      | with Diazepam      |
|------------------|----------------------|--------------------|--------------------|
| $K_{sv}(M^{-1})$ | $2.29 \times 10^4$   | $1.45 \times 10^4$ | $2.10 \times 10^4$ |
| $R^2$            | 0.99                 | 0.99               | 0.99               |

**Supplementary Table 4:** Effect of Site Markers on Binding of PYZ to BSA

| Parameters       | Without site markers | with warfarin     | with Diazepam     |
|------------------|----------------------|-------------------|-------------------|
| $K_{sv}(M^{-1})$ | $1.05 \times 10^4$   | $.98 \times 10^4$ | $.63 \times 10^4$ |
| $R^2$            | 0.99                 | 0.99              | 0.99              |

**Supplementary Table 5:** Per cent  $\alpha$  helical content of BSA and HSA in the absence and presence of different concentration of pyrazinamide.

| <b>Conditions</b>       | <b>Hydrodynamic radii<br/>(nm)</b> |
|-------------------------|------------------------------------|
| <b>HSA</b>              | 57.42±0.67                         |
| <b>HSA + PYZ (1:5)</b>  | 60.24±0.55                         |
| <b>HSA + PYZ (1:12)</b> | 62.62±0.38                         |
| <b>BSA</b>              | 66.30±0.02                         |
| <b>BSA + PYZ (1:5)</b>  | 69.39±0.03                         |
| <b>BSA + PYZ (1:12)</b> | 72.22±0.02                         |

**Supplementary Table 6:** Hydrodynamic radii and polydispersity values of HSA/BSA in the absence and presence of different concentration of PYZ

| <b>Conditions</b>       | <b>Hydrodynamic radii<br/>(nm)</b> | <b>Polydispersity value<br/>(%)</b> |
|-------------------------|------------------------------------|-------------------------------------|
| <b>HSA</b>              | 3.4±0.04                           | 11.5                                |
| <b>HSA + PYZ (1:5)</b>  | 3.2±0.02                           | 12.1                                |
| <b>HSA + PYZ (1:12)</b> | 2.6±0.03                           | 13.2                                |
| <b>BSA</b>              | 3.7±0.02                           | 11.8                                |
| <b>BSA + PYZ (1:5)</b>  | 3.3±0.03                           | 13.2                                |
| <b>BSA + PYZ (1:12)</b> | 3.1±0.02                           | 13.5                                |

**Supplementary Table 7:** Molecular docking parameters of HSA/BSA-PYZ complex

| Protein    | Binding Site | Amino acids | Forces involved              | $\Delta G$ (kcalmol <sup>-1</sup> ) |
|------------|--------------|-------------|------------------------------|-------------------------------------|
| <b>HSA</b> | Site I       | Leu 219     | Hydrophobic<br>and H-Bonding | -3.47                               |
|            |              | Leu 238     |                              |                                     |
|            |              | Arg 257     |                              |                                     |
|            |              | Leu 260     |                              |                                     |
|            |              | Ser 287     |                              |                                     |
|            |              | Ile 290     |                              |                                     |
|            |              | Ala 291     |                              |                                     |
|            |              | Tyr 401     |                              |                                     |
| <b>BSA</b> | Site II      | Lys 402     | Hydrophobic<br>and H-Bonding | -6.53                               |
|            |              | Asn 405     |                              |                                     |
|            |              | Ala 406     |                              |                                     |
|            |              | Leu 429     |                              |                                     |
|            |              | Met 548     |                              |                                     |
|            |              | Lys 545     |                              |                                     |
|            |              | Asp 549     |                              |                                     |

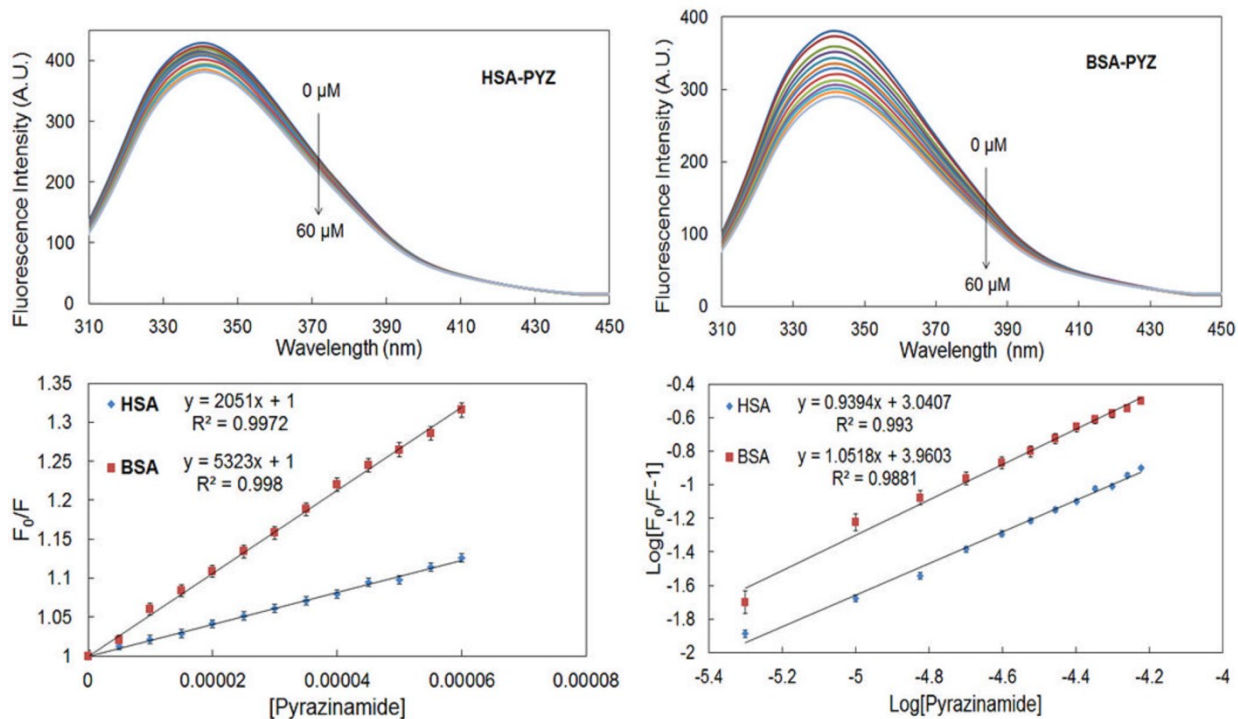

**Supplementary Figure 1:** PYZ-induced fluorescence quenching of (A) HSA and (B) BSA. The concentration of protein was 5  $\mu\text{M}$  and the concentration of PYZ was varied from 0-60  $\mu\text{M}$ . The intrinsic fluorescence of the proteins was measured upon excitation at 295 nm in 20 mM sodium phosphate buffer, pH 7.4 at 298 K, (C) Stern-Volmer plot for HSA/BSA- PYZ interactions (D) Logarithmic Stern-Volmer plot for HSA/BSA- PYZ interactions at 298 K.

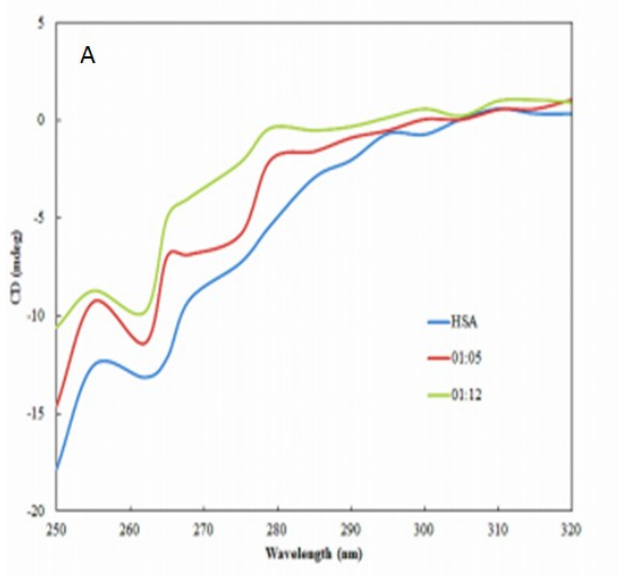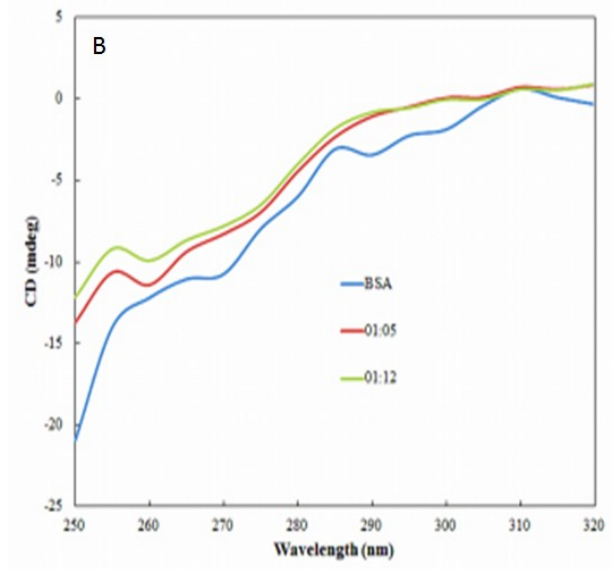

**Supplementary figure 2:** Near-UV CD spectra of (A) HSA (15  $\mu\text{M}$ ) and (B) BSA (15  $\mu\text{M}$ ) alone and in the presence of PYZ.

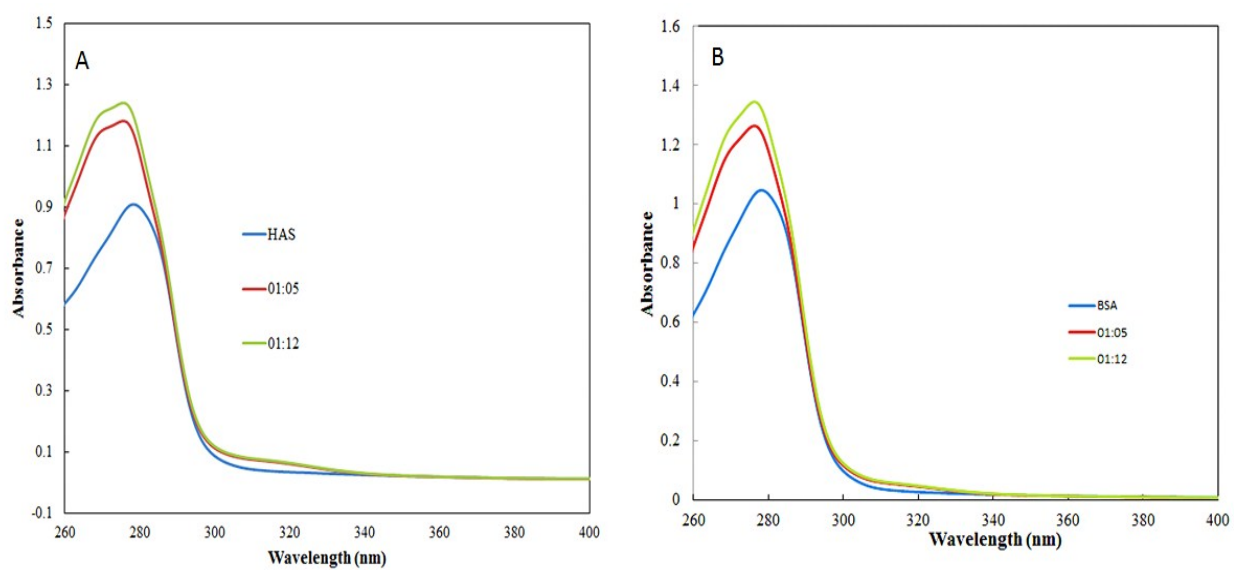

**Supplementary Figure 3:** UV Absorption spectra of (A) HSA and (B) BSA in absence and presence of PYZ.
